# Supplementary material
Source: publisher figshare collection journal article supplement (https://asha.figshare.com/articles/dataset/_/21357558)
Supplement: Supplementary file 1 [file 2]

**Supplemental Material S2.** Data extraction form with example data extracted for one study.

| Participant Characteristics                                                                                                                                                                                                                                                                                    |                                                                                                                                                                                                                                                                                                 |                        |                      |                   |                                         |                                                                      |                                         |
|----------------------------------------------------------------------------------------------------------------------------------------------------------------------------------------------------------------------------------------------------------------------------------------------------------------|-------------------------------------------------------------------------------------------------------------------------------------------------------------------------------------------------------------------------------------------------------------------------------------------------|------------------------|----------------------|-------------------|-----------------------------------------|----------------------------------------------------------------------|-----------------------------------------|
| Reference                                                                                                                                                                                                                                                                                                      | Research question stated in the study                                                                                                                                                                                                                                                           | Number of participants | Participants with CP | Diagnosis         | Age (years)                             | Other characteristics/ additional diagnoses (motor/speech abilities) | Literacy skills at baseline             |
| e.g.,<br>Ainsworth, M. K.,<br>Evmenova, A. S.,<br>Behrmann, M., &<br>Jerome, M. (2016).<br>Teaching phonics to<br>groups of middle school<br>students with autism,<br>intellectual disabilities<br>and complex<br>communication needs.<br><i>Research in<br/>Developmental<br/>Disabilities, 56</i> , 165-176. | "Is there a functional<br>relation between the<br>use of direct instruction<br>using a structured<br>curriculum and<br>increased accuracy of<br>letter-sound<br>correspondence by<br>middle school students<br>with severe disabilities<br>and complex<br>communication<br>disorders?" (p. 167) | 8                      | 1                    | Cerebral<br>palsy | 11-16 years<br>(CP participant<br>= 13) | Moderate intellectual<br>disability.<br>No vocalizations.            | Able to identify<br>one letter<br>sound |

*Note.* The data extraction form was used for all studies included in the systematic review. One study is included here as an example. Data included across all tables in this file relate to Ainsworth et al. (2016).

| Instruction Characteristics              |                                                                                                                      |            |          |                                                 |                             |
|------------------------------------------|----------------------------------------------------------------------------------------------------------------------|------------|----------|-------------------------------------------------|-----------------------------|
| Setting                                  | Program                                                                                                              | Instructor | Duration | Intensity (minutes per session - days per week) | Target skills               |
| e.g., variety of locations within school | Letter-sound correspondence portion of the Accessible Literacy Learning (ALL) Curriculum (Light & McNaughton, 2009). | Researcher | 3 months | 45-60 min sessions 3 x per week                 | Letter-sound correspondence |

| Instruction Outcomes                                                         |                               |                 |                                                                                                                                                                                                                                                                                                |             |
|------------------------------------------------------------------------------|-------------------------------|-----------------|------------------------------------------------------------------------------------------------------------------------------------------------------------------------------------------------------------------------------------------------------------------------------------------------|-------------|
| Design of Study                                                              | Dependent (outcome) variables | Analyses        | Results                                                                                                                                                                                                                                                                                        | NAP         |
| e.g., single-subject, multiple-baseline across groups of participants design | Letter-sound correspondence   | Visual analysis | Gains in letter-sound correspondence once treatment phase introduced. “A regulated multiple-baseline randomization test indicated statistically significant difference between the participants’ acquisition of letter sound combinations with and without the ALL Curriculum ( $p = .0026$ )” | NAP = .9375 |
